1 **Original article**

2 **Prevalence of SARS-CoV-2 infection among COVID-19 RT-PCR**

3 **laboratory workers in Bangladesh**

4 **Authors:** Mohammad Jahidur Rahman Khan<sup>\*1</sup>, Samshad Jahan Shumu<sup>2</sup>, Ruksana Raihan<sup>3</sup>,

5 Nusrat Mannan<sup>4</sup>, Md. Selim Reza<sup>5</sup>, Nazia Hasan Khan<sup>6</sup>, Amirul Huda Bhuiyan<sup>7</sup>, Paroma

6 Deb<sup>8</sup>, Farzana Mim<sup>9</sup>, Arifa Akram<sup>\*10</sup>

7 <sup>1</sup> Department of Microbiology, Shaheed Suhrawardy Medical College, Dhaka, Bangladesh

8 <sup>2</sup> Department of Microbiology, Shaheed Suhrawardy Medical College, Dhaka, Bangladesh

9 <sup>3</sup> Department of Microbiology, US-Bangla Medical College, Dhaka, Bangladesh

10 <sup>4</sup> Department of Microbiology, US-Bangla Medical College, Dhaka, Bangladesh

11 <sup>5</sup> RT-PCR LAB, Bangabandhu Sheikh Mujib Medical College, Faridpur, Bangladesh

12 <sup>6</sup> RT-PCR LAB, United Hospital Limited, Dhaka, Bangladesh

13 <sup>7</sup> RT-PCR LAB, Narayanganj 300 Bed Hospital, Narayanganj Bangladesh

14 <sup>8</sup> Department of Virology, Dhaka Medical College, Dhaka, Bangladesh

15 <sup>9</sup> Department of Biochemistry & Molecular Biology, Jahangirnagar University, Dhaka,

16 Bangladesh

17 <sup>10</sup> Department of Virology, National Institute of Laboratory Medicine and Referral

18 Centre, Dhaka, Bangladesh

19 **\*Corresponding Author:**

20 Mohammad Jahidur Rahman Khan

21 Assistant Professor

22 Department of Microbiology, Shaheed Suhrawardy Medical College,

23 Sher-E-Bangla Nagar, Agargaon, Dhaka-1207 Dhaka, Bangladesh

24 Mobile: +880-1760501588

25 E-mail: jahid29th@gmail.com

26 **Abstract**

27 **Background:**

28 Health care workers (HCWs) at the frontline are confronting a substantial risk of infection  
29 during the coronavirus disease 2019 (COVID-19) pandemic. This emerging virus created  
30 specific hazards to researchers and laboratory staff in a clinical setting, underlined by rapid  
31 and extensive worldwide transmission. This study aimed to investigate the prevalence of  
32 SARS-CoV-2 infection among COVID-19 RT-PCR laboratory health workers in Bangladesh.

33 **Materials & Methods:**

34 This retrospective study was conducted between October 2 to December 2, 2020. A total of  
35 508 participants, including doctors, scientific officers, medical technologists, and cleaners  
36 working in several COVID-19 RT-PCR laboratories, were included in this study. Data were  
37 collected from each participant using a semi-structured questionnaire prepared in the format  
38 of an anonymous Google form. All participants provided informed consent. The Ethical  
39 clearance was obtained from the Institutional Ethics Review Committee of Shaheed  
40 Suhrawardy Medical College, Dhaka, Bangladesh. All statistical analyses were performed  
41 using SPSS (Statistical Package for the Social Sciences) version 25.0 software (SPSS, Inc).

42 **Results:**

43 Out of the 508 participants, 295 tested positive for SARS CoV-2 RT-PCR. Among the  
44 positive cases, 202 were men, 93 were women, with the median age of 30 years. The most  
45 positive cases were medical technologists (53.22%) followed by doctors (28.8%). Out of the  
46 271 symptomatic positive cases, the most typical symptoms were fever (78.5%), fatigue  
47 (70%), loss of smell and taste (65%), cough (64%), and others. Hypertension, obesity, and  
48 diabetes were found in 8.8%, 8.8%, and 7.1% positive cases. A + blood group was present in  
49 37% of the positive cases, followed by the B+ blood group (27%) and O+ blood group  
50 (25%). Inadequate supply of personal protection equipment (PPE), absence of negative

51 pressure ventilation, laboratory contamination, and no training on molecular test methods  
52 were found in 13.8%, 67.8%, 44.7%, and 40.6% of positive cases, respectively.

53 **Conclusion:**

54 Evaluating the infection status of laboratory health workers is crucial for drawing attention  
55 from the public, providing practical suggestions for government agencies, and increasing  
56 protective measures for laboratory health workers.

57 **Keywords:** RT-PCR laboratory, Quality control, Personal protection equipment, Risk factor  
58 Laboratory health worker, Medical technicians, Contamination

59

60

61

62

63

64

65

66

67

68

69

70

71

72

73

74

75

## 76 **Introduction**

77 Since its discovery, SARS-CoV-2 has shaken out of the world and has become a pandemic.  
78 As of September 4, 2021, there were 220,362,472 reported cases and 4,562,679 deaths  
79 worldwide<sup>1</sup>. In Bangladesh, the first case of SARS-CoV-2 infection was confirmed on March  
80 8, 2020. Subsequently, Bangladesh was facing an increasing risk of imports and some local  
81 cluster cases of COVID-19. As of September 4, 2021, there are 1,510,283 confirmed cases  
82 and 26,432 deaths in Bangladesh<sup>2</sup>.

83

84 Health care personnel around the globe have the most significant risk of getting infected and  
85 infecting others in their surrounding environment<sup>3</sup>. According to initial estimation, healthcare  
86 workers account for 10%–20% of all confirmed cases<sup>4</sup>. During the pandemic, medical  
87 services worldwide is facing an unavoidable burden of public health challenges<sup>5</sup>. In  
88 Bangladesh, most molecular laboratories performed RT-PCR to detect SARS-CoV-2 have  
89 been established after the pandemic began. These facilities were confronted an increased  
90 amount of real-time reverse transcriptase-polymerase chain reaction (RT-PCR) testing of  
91 SARS-CoV-2 for patients suspected as Covid-19, quarantined healthcare workers; travelers  
92 came back from high-risk countries as well as other required samples. The staff available for  
93 the laboratory was swiftly deployed to receive the large number of clinical samples without  
94 adequate amounts of training and PPEs. To confront this novel coronavirus never  
95 experienced before, some public health laboratory workers overlooked concerns about the  
96 possible risks of SARS-CoV-2 infection from their occupational exposure. While the  
97 protection of laboratory healthcare workers during the COVID-19 pandemic is one of the  
98 primary concerns, data regarding this issue are still inadequate<sup>6</sup>.

99

100 At present, around 1200 health workers, including doctors, microbiologists, biochemists,  
101 molecular biologists, medical technologists, cleaners, are working in over 100 COVID-19  
102 RT-PCR laboratories across the country<sup>7</sup>. Many of them were infected by SARS-CoV-2  
103 during this ongoing pandemic. They become a source of contamination in many laboratories<sup>8</sup>.  
104 The testing capacity of a COVID-19 RT-PCR laboratory is reduced when several workers  
105 become SARS-CoV-2 infected. The physical environment of the laboratory and workload  
106 play an essential role in transmitting SARS-CoV-2 among the laboratory workers<sup>9</sup>. The  
107 chance of getting infected by SARS-CoV-2 also depends on a laboratory health worker's age,  
108 comorbidity, and functional skill<sup>10</sup>.

109

110 Thus, we conducted a retrospective study to investigate the prevalence of SARS-CoV-2  
111 infection among COVID-19 RT-PCR laboratory health workers in Bangladesh and assess the  
112 underlying factors related to the high infection rate of SARS-CoV-2.

113

## 114 **Methods:**

### 115 **Study Design and data collection**

116 We conducted a retrospective online survey from October 2 to December 2, 2020. A semi-  
117 structured questionnaire was prepared using an anonymous Google form. The generated link  
118 was shared with the focal persons of each laboratory and several Facebook and WhatsApp  
119 groups involving doctors and medical technologists. We decided to collect the data using  
120 online approaches and maintain social distance during Bangladesh's pandemic condition.  
121 Additional data were collected from some participants who did not fill the Google form  
122 entirely over the telephone. A hard copy of the questionnaire was also supplied to some  
123 participants who were not habituated with online submission by Google form.

124

## 125 **Study population**

126 Total 534 laboratory health workers, including doctors, scientific officers (microbiologist,  
127 biochemist, molecular biologist), medical technologists, and cleaners, filled up the Google  
128 form. Twenty-six participants were excluded as they had COVID-19 like symptoms, but RT-  
129 PCR did not confirm the diagnosis. The remaining 508 laboratory health workers from  
130 multiple COVID-19 RT-PCR laboratories were included in this study. Informed consent was  
131 obtained from all participants.

## 132 **Statistical Analysis**

133 The confirmed COVID-19 cases among HCWs were categorized according to the following  
134 parameters: sex, occupation type, hospital type, infection status, and others. All statistical  
135 analyses were performed using SPSS (Statistical Package for the Social Sciences) version  
136 25.0 software (SPSS, Inc).

## 137 **Results**

138 Among the 508 participants, 295 (58%) were tested positive for SARS-CoV-2 RT-PCR, and  
139 237 (80.3%) were between the 24-44 years age group; male participants were 68.5%, and  
140 females were 31.5% (Table 1). Most participants were medical technologists (53.7%),  
141 followed by doctors (27.2%) (Table 2). Among the 295 positive cases, 271 were  
142 symptomatic. Analyzing the symptoms, we found 78.5% of them had fever, fatigue (70%),  
143 loss of smell and taste (65%), cough (64%), and others (Figure 1). Among the positive cases,  
144 the A+ blood group (37%) was affected more by COVID-19, followed by the B+ blood group  
145 (27%) (Figure 2). We analyzed their comorbidity status and found that hypertension and  
146 obesity were most common, 8% in both cases, followed by diabetes (7%) (Table 3). Among  
147 the positive cases, 13.8% had not an adequate supply of personal protection equipment (PPE),  
148 67.8% had not the negative pressure ventilation system, 44.7% had an incidence of laboratory

149 contamination, and 40.6% did not get any kind of training on molecular test methods or  
150 quality control (QC) (Table 4).

151

## 152 **Discussion**

153 Findings from a previous pandemic of other coronaviruses revealed that frontline healthcare  
154 workers (HCWs) were at the highest risk of infection because of close contact with infected  
155 patients, touching the contaminated surfaces, the hiding of epidemiological histories by  
156 patients, inadequate training for infection prevention and control and conducting the high-risk  
157 procedures in airway management<sup>11,12</sup>. Additional laboratory professionals, including  
158 virologists, microbiologists, medical technologists, cleaners, are also at high risk through  
159 exposure to specimens collected from SARS-CoV-2 infected patients. This study  
160 retrospectively collected epidemiological and related data of laboratory personnel working in  
161 multiple COVID-19 RT-PCR laboratories. Among the 508 participants of our research, we  
162 found 295 (58%) lab workers became positive during their services, and most of them were  
163 male and young (24-44 years age group).

164

165 Among laboratory health workers, medical technicians (MTs) possess a higher risk of  
166 regular handling of both symptomatic and asymptomatic cases<sup>13</sup>. Our study also found that  
167 medical technicians affected more almost 53% of cases. Analyzing the symptoms of positive  
168 cases, we found fever (78%), fatigue (70%), loss of smell and taste (65%), cough (64%),  
169 breathlessness (15%), and diarrhea (14%). Most of the cases were symptomatic (91%). A  
170 meta-analysis study on COVID-19 comorbidities shows that the most common comorbidities  
171 identified are hypertension (15.8%), which also matched our research; we found it in 8% of  
172 cases<sup>14</sup>. Blood group A had a significantly higher risk for acquiring COVID-19 than other  
173 blood groups in our study, which is also matched with the study of Barcelona<sup>15</sup>.

174

175 SARS-CoV-2 can be transmitted during the incubation period when a patient has nonspecific  
176 symptoms or no symptoms at all<sup>14</sup>. Therefore, it is necessary to protect them from SARS-  
177 CoV-2 infection, and additional transmission-based precautions should be taken<sup>15</sup>. HCWs  
178 infected by SARS-CoV-2 can increase the risk of transmission, and their absence from work  
179 can decrease health service performance. These may disrupt the chain management of a  
180 transmission<sup>16</sup>. To minimize the risk of transmission, healthcare workers should be provided  
181 with sufficient personal protective equipment (PPE) supplies, training on infection control,  
182 maintenance of personal hygiene, waste management<sup>17</sup>. Laboratory staff is advised to use  
183 PPE like the surgical or N95 mask, gowns, shield in the correct order, and they must be  
184 trained about it. Several studies have suggested that factors such as sufficient supplies of  
185 PPE, hands-on training on how to use them, etc., perform a crucial role in controlling such  
186 infections, which notably decreases the risk of transmission<sup>18</sup>. During the pandemic,  
187 especially at the initial stage, the global scarcity of masks, respirators, face shields, and  
188 gowns developed due to the sudden increase in demand and supply chain interference.  
189 Therefore, laboratory workers must preserve PPE by increased use or reuse, and infection  
190 prevention and control protocols could be maintained for the same reason<sup>19</sup>. Our study  
191 revealed that 13.8% of SARS-CoV-2 infected laboratory workers had an inadequate supply  
192 of PPE, and 67.8% had no negative pressure ventilation system in their workplace. 40.6% of  
193 SARS-CoV-2 infected laboratory workers did not train on molecular test methods or quality  
194 control (QC).

195

196 Healthcare workers play an essential role in in-hospital transmission. They are a potential  
197 source of nosocomial infection<sup>20,21,22</sup>. In severe acute respiratory syndrome coronavirus  
198 (SERS-CoV) and Middle East respiratory syndrome coronavirus (MERS-CoV) infection,



199 nosocomial outbreaks have played a crucial part in spreading these viruses. The proportions  
200 of nosocomial conditions with early outbreaks of COVID-19, SARS, and MERS were 44.0%,  
201 36.0%, and 56.0%, respectively<sup>23</sup>. In our study, 44.7% of SARS-CoV-2 infected laboratory  
202 workers gave a history of laboratory contamination within six months.

203

204 Our study has some notable limitations. First, we could not collect biochemical data from all  
205 HCWs and could not manage the duration of hospital stay. Moreover, we did not obtain  
206 Whole Genome Sequencing of the healthcare workers who tested positive for SARS-CoV-2,  
207 and analyses should be interpreted with caution because of the small sample size.

208

## 209 **Conclusion**

210 The safety of laboratory health workers should be confirmed to end the pandemic, as  
211 COVID-19 is ongoing. In this study, we tried to analyze the infection status of laboratory  
212 health workers as it is not done before in Bangladesh, and it is essential to attract enough  
213 attention from the government and public. It will draw the attention of the government and  
214 non-government agencies to maintain the QC of COVID-19 RT-PCR laboratories, to improve  
215 protective measures like the adequate supply of PPE, and to arrange more hands-on training  
216 for laboratory health workers.

217

218

219

220

221

222

223

224 **Declarations**

225 **Ethics approval and consent to participate:**

226 This study was approved by the Ethical Review Committee of Shaheed Suhrawardy Medical  
227 College, Dhaka, Bangladesh (No-ShSMCH/Ethical/2021/08).

228 **Consent for publication:**

229 Written informed consent was taken from each participant.

230 **Data Access Statements:**

231 The datasets used and analyzed during the current study are available from the corresponding  
232 author on reasonable request.

233 **Funding:**

234 No funding was received to perform this study.

235 **Authors' contributions:**

236 SJS, NM and RR supervised the study. NR, AHV and PD take part in conceptualization and  
237 methodology. AA and FM analyzed and interpreted the patient data. MSR performed the  
238 qRT-PCR. MJRK was the main contributor in writing the manuscript. All authors read and  
239 approved the final manuscript.

240

241

242

243

244

245

246

247

248

249 **Conflict of Interest and Authorship Conformation Form:**

250 All authors have participated in (a) conception and design, or analysis and interpretation of  
251 the data; (b) drafting the article or revising it critically for important intellectual content; and  
252 (c) approval of the final version. This manuscript has not been submitted to, nor is under  
253 review at, another journal or other publishing venue. The authors have no affiliation with any  
254 organization with a direct or indirect financial interest in the subject matter discussed in the  
255 manuscript.

256

257

258

259

260

261

262

263

264

265

266

267

268

269

270

271

272 **Acknowledgments:**

273 First, we would like to express our sincere gratitude to the Institute of Epidemiology, Disease  
274 Control and Research (IEDCR) for supplying us with all types of rapid antigen test kits as  
275 part of the validation procedure. We would like to thank the principal of Shaheed Suhrawardy  
276 Medical College for permitting this study in his institute. We would also like to thank all of  
277 the doctors and laboratory staff of the Department of Microbiology for their continuous  
278 support throughout the study. We are also grateful to all of the study participants who  
279 actively participated and co-operated to make it possible to complete this study. Finally, we  
280 would like to thank all the people who have supported me to complete the research work  
281 directly or indirectly.

282

283

284

285

286

287

288

289

290

291

292

293

294

295

296

297 **REFERENCES**

- 298 1. COVID Live Update: 220,362,472 Cases and 4,562,679 Deaths from the Coronavirus -  
299 Worldometer [Internet]. [cited 2021 Sep 4]. Available from:  
300 <https://www.worldometers.info/coronavirus/>
- 301 2. COVID-19 [Internet]. [cited 2021 Sep 4]. Available from:  
302 <http://103.247.238.92/webportal/pages/covid19.php>
- 303 3. Lahner E, Dilaghi E, Prestigiacomo C, Alessio G, Marcellini L, Simmaco M, et al.  
304 Prevalence of Sars-Cov-2 Infection in Health Workers (HWs) and Diagnostic Test  
305 Performance: The Experience of a Teaching Hospital in Central Italy. *Int J Environ Res*  
306 *Public Health*. 2020 Jan;17(12):4417.
- 307 4. Anderson RM, Heesterbeek H, Klinkenberg D, Hollingsworth TD. How will country-  
308 based mitigation measures influence the course of the COVID-19 epidemic? *Lancet*  
309 [Internet]. 2020 Mar 9 [cited 2021 Sep 4];395(10228). Available from:  
310 <https://ora.ox.ac.uk/objects/uuid:adb3a0b8-7de6-4fc8-9092-7934e36192b0>
- 311 5. Albano PM, Notarte KI, Macaranas I, Maralit B. Cross-contamination in Molecular  
312 Diagnostic Laboratories in Low- and Middle-income Countries □: *PJP*. 2020 Nov  
313 5;5(2):7–11.
- 314 6. Iwen PC, Stiles KL, Pentella MA. Safety Considerations in the Laboratory Testing of  
315 Specimens Suspected or Known to Contain the Severe Acute Respiratory Syndrome  
316 Coronavirus 2 (SARS-CoV-2). *Am J Clin Pathol*. 2020 April 15;153(5):567–70.
- 317 7. *rt\_pcr\_lab.pdf* [Internet]. [cited 2021 Sep 4]. Available from:  
318 [https://dghs.gov.bd/images/docs/Notice/rt\\_pcr\\_lab.pdf](https://dghs.gov.bd/images/docs/Notice/rt_pcr_lab.pdf)

- 319 8. University of Santo Tomas, Manila, Philippines, Albano PM. Cross-contamination in  
320 Molecular Diagnostic Laboratories in Low- and Middle-income Countries: A Challenge  
321 to COVID-19 Testing. *Philipp J Pathol*. 2020 December 31;5(2):7–11.
- 322 9. Huggett JF, Benes V, Bustin SA, Garson JA, Harris K, Kammel M, et al. Cautionary  
323 Note on Contamination of Reagents Used for Molecular Detection of SARS-CoV-2.  
324 *Clin Chem*. 2020 Nov 1;66(11):1369–72.
- 325 10. Zuckerman NS, Pando R, Bucris E, Drori Y, Lustig Y, Erster O, et al. Comprehensive  
326 Analyses of SARS-CoV-2 Transmission in a Public Health Virology Laboratory.  
327 *Viruses*. 2020 Aug;12(8):854.
- 328 11. Escombe AR, Oeser CC, Gilman RH, Navincopa M, Ticona E, Pan W, et al. Natural  
329 ventilation for the prevention of airborne contagion. *PLoS Med*. 2007;4(2):e68.
- 330 12. Frieden TR, Lee CT. Identifying and interrupting superspreading events—implications  
331 for control of severe acute respiratory syndrome coronavirus 2. *Emerg Infect Dis*.  
332 2020;26(6):1059.
- 333 13. Sadeghi M. The Role of Possible Factors Affecting the Risk of Getting Infected by  
334 COVID-19 in Emergency Medical Technicians: A Case-Control Study. :12.
- 335 14. Sanyaolu A, Okorie C, Marinkovic A, Patidar R, Younis K, Desai P, Hosein Z, Padda I,  
336 Mangat J, Altaf M. Comorbidity and its Impact on Patients with COVID-19. *SN Compr Clin*  
337 *Med*. 2020 Jun 25:1-8. doi: 10.1007/s42399-020-00363-4. Epub ahead of print. PMID:  
338 32838147; PMCID: PMC7314621.
- 339 15. Muñoz-Díaz E, Llopis J, Parra R, Roig I, Ferrer G, Grifols J, Millán A, Ene G, Ramiro L,  
340 Maglio L, García N. Relationship between the ABO blood group and COVID-19

- 341 susceptibility, severity and mortality in two cohorts of patients. *Blood Transfusion*. 2021  
342 Jan;19(1):54.
- 343 16. Callaway E, Cyranoski D. China coronavirus: six questions scientists are asking. *Nature*.  
344 2020;577(7791):605–8.
- 345 17. McGarry BE, Grabowski DC, Barnett ML. Severe staffing and personal protective  
346 equipment shortages faced by nursing homes during the COVID-19 pandemic: study  
347 examines staffing and personal protective equipment shortages faced by nursing homes  
348 during the COVID-19 pandemic. *Health Aff (Millwood)*. 2020;39(10):1812–21.
- 349 18. Fischer RJ, Morris DH, van Doremalen N, Sarchette S, Matson MJ, Bushmaker T, et al.  
350 Effectiveness of N95 respirator decontamination and reuse against SARS-CoV-2 virus.  
351 *Emerg Infect Dis*. 2020;26(9):2253.
- 352 19. Schwartz A, Stiegel M, Greeson N, Vogel A, Thomann W, Brown M, et al.  
353 Decontamination and reuse of N95 respirators with hydrogen peroxide vapor to address  
354 worldwide personal protective equipment shortages during the SARS-CoV-2 (COVID-  
355 19) pandemic. *Appl Biosaf*. 2020;25(2):67–70.
- 356 20. Cook T. Personal protective equipment during the coronavirus disease (COVID) 2019  
357 pandemic—a narrative review. *Anaesthesia*. 2020;75(7):920–7.
- 358 21. Lancet T. COVID-19: protecting healthcare workers. *Lancet Lond Engl*.  
359 2020;395(10228):922.
- 360 22. Lai X, Wang M, Qin C, Tan L, Ran L, Chen D, et al. Coronavirus disease 2019 (COVID-  
361 2019) infection among healthcare workers and implications for prevention measures in a  
362 tertiary hospital in Wuhan, China. *JAMA Netw Open*. 2020;3(5):e209666–e209666.

363 23. Zhou Q, Gao Y, Wang X, Liu R, Du P, Wang X, et al. Nosocomial infections among  
364 patients with COVID-19, SARS and MERS: a rapid review and meta-analysis. *Ann*  
365 *Transl Med.* 2020;8(10).

366

367

368

369

370

371

372

373

374

375

376

377

378

379

380

381

382

383

384

385

386



387

388

Table 1: Demographic data of the study population.

|             |             | SARS-CoV-2 RT-PCR |             |
|-------------|-------------|-------------------|-------------|
|             | Total       | Positive          | Negative    |
|             | 508 (100%)  | 295 (58%)         | 213 (42%)   |
| Age (years) |             |                   |             |
| Median      | 30          | 30                | 30          |
| <24 (%)     | 50 (9.8%)   | 27 (9.2%)         | 23 (10.8%)  |
| 24-44 (%)   | 413 (81.3%) | 237 (80.3%)       | 176 (82.6%) |
| >44 (%)     | 45 (8.9%)   | 31 (10.5%)        | 14 (6.6%)   |
| Sex         |             |                   |             |
| Male (%)    | 344 (67.7%) | 202 (68.5%)       | 142 (66.7%) |
| Female (%)  | 164 (32.3%) | 93 (31.5%)        | 71 (33.3%)  |

389

390

391

392

393

394

395

396

397

398

399

400

401

402

403 Table 2: Infection rate according to the designation of laboratory workers.

| <b>Designation</b>   | <b>Total participants<br/>(n= 508)</b> | <b>SARS-CoV-2 RT-PCR</b> |                          |
|----------------------|----------------------------------------|--------------------------|--------------------------|
|                      |                                        | <b>Positive (n= 295)</b> | <b>Negative (n= 213)</b> |
| Doctor               | 138 (27.2%)                            | 85 (61.6%)               | 53 (38.4%)               |
| Scientific officer   | 53 (10.5%)                             | 27 (50.9%)               | 26 (49.1%)               |
| Medical Technologist | 273 (53.7%)                            | 157 (57.5%)              | 116 (42.5%)              |
| Cleaner              | 44 (8.6%)                              | 26 (59.0%)               | 18 (41.0%)               |

404

405

406

407

408

409

410

411

412

413

414

415

416

417

418

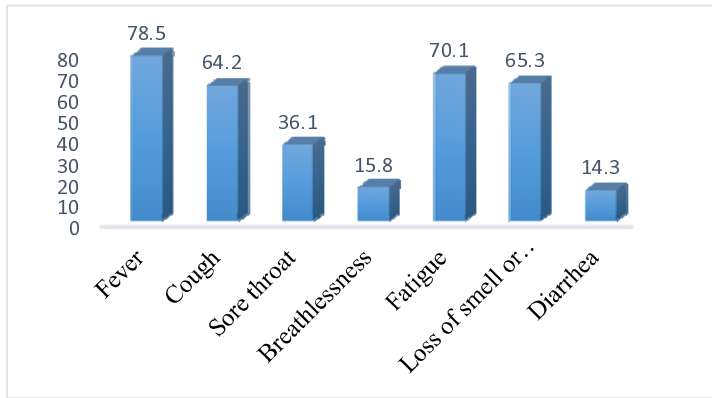

419

Figure 1: Symptoms of the SARS-CoV-2 RT-PCR-positive cases (%)

420

421

422

423

424

425

426

427

428

429

430

431

432

433

434

435

436

437

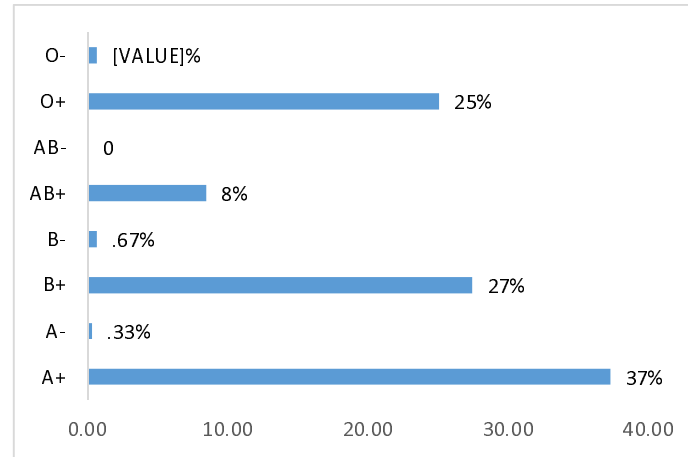

438

439

Figure 2: Blood group distribution among the SARS-CoV-2 RT-PCR-positive cases.

440

441

442

443

444

445

446

447

448

449

450

451

452

453

454

455

456 Table 3: Comorbidities found in SARS-CoV-2 RT-PCR-positive and SARS-CoV-2 RT-PCR-  
457 negative cases.

| Comorbidity | Total participants<br>(n= 508) | SARS-CoV-2 RT-PCR |                   |
|-------------|--------------------------------|-------------------|-------------------|
|             |                                | Positive (n= 295) | Negative (n= 213) |
| DM          | 28 (5.5%)                      | 21 (7.1%)         | 07 (3.3%)         |
| HTN         | 38 (7.5%)                      | 26 (8.8%)         | 12 (5.6%)         |
| Asthma      | 21 (4.1%)                      | 15 (5.0%)         | 06 (2.8%)         |
| Obesity     | 44 (8.6%)                      | 26 (8.8%)         | 18 (8.4%)         |
| IHD         | 06 (1.1%)                      | 05 (1.7%)         | 01 (0.5%)         |

458

459

460

461

462

463

464

465

466

467

468

469

470

471

472

473

474

475 Table 4: Association of risk factors among SARS-CoV-2 RT-PCR-positive cases.

| <b>Risk factors</b>                      | <b>SARS-CoV-2 RT-PCR-positive cases</b> |
|------------------------------------------|-----------------------------------------|
| Inadequate supply of standard PPE        | 13.8%                                   |
| Absence of negative pressure ventilation | 67.8%                                   |
| Incidence of laboratory contamination    | 44.7%                                   |
| No training on molecular test methods    | 40.6%                                   |

476

477

478

479

480
